# Supplementary material for: An experimental task to examine the mirror system in rats
Source: PubMed Central journal article supplement — Sci Rep. 2014 Oct 17;4:6652. doi: 10.1038/srep06652 (PMC4200406; doi:10.1038/srep06652), 2014-10-17
Supplement: srep06652-s1.pdf [file srep06652-s1.pdf]

## **Supplemental Information**

**Title:** An experimental task to examine the mirror system in rats

**Authors:** Yuji Takano<sup>1,2</sup>, Masatoshi Ukezono<sup>1,2,3</sup>

### **Affiliations:**

<sup>1</sup>NTT Communication Science Laboratories, Nippon Telegraph and Telephone Corporation.

<sup>2</sup>CREST, Japan Science and Technology Agency.

<sup>3</sup>Department of Psychology, Meiji Gakuin University.

Correspondence should be addressed to Y.T.  
(takano.yuji@lab.ntt.co.jp)

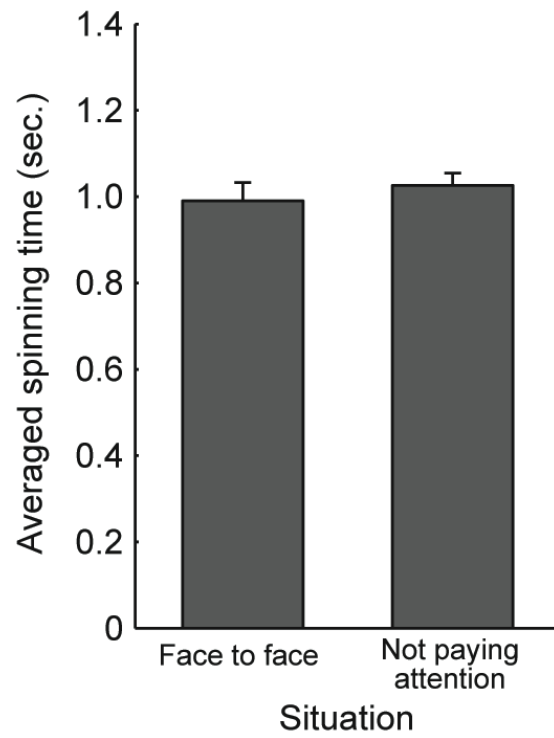

**Figure S1** Comparison of spinning times between “face to face” and “not paying attention” situations. The difference was not significant ( $t(9) = 0.85$ , n.s.).

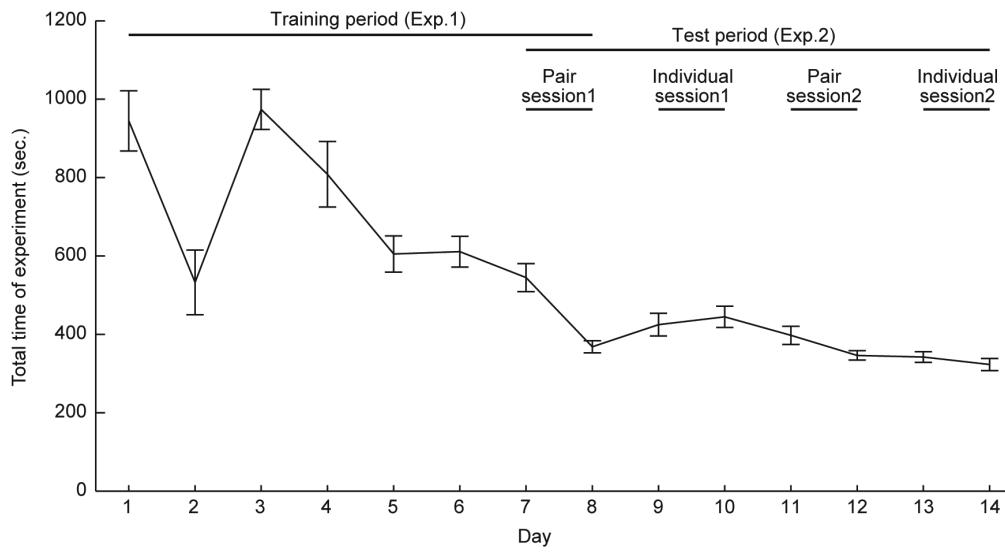

**Figure S2** Average daily session time. Error bars represent standard error.

### Example of “face to face”

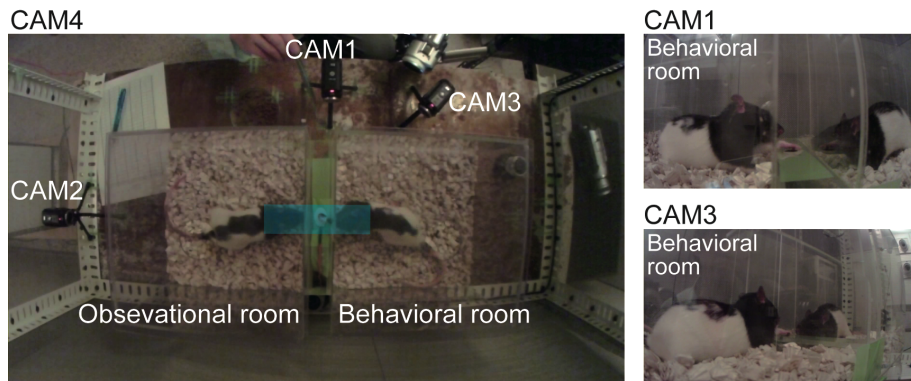

### Example of “ambiguous”

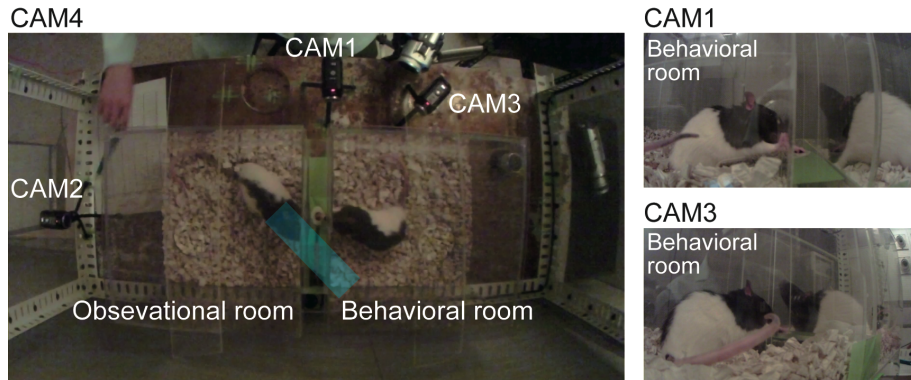

**Figure S3** Criterion for “face to face” situation. In the overview image (CAM4), we judged whether a “ruler” covering the width of the observing rat’s head (blue rectangle) also covered the reaching rat’s head. In the other three images, we judged whether the two rats were actually face-to-face.
